# Supplementary material for: Development and validation of a model for staging hepatic fibrosis for chronic hepatitis B patients with E antigen-positive
Source: PubMed Central journal article supplement (PMC5716769; doi:10.18632/oncotarget.22003), 2017-10-24
Supplement: oncotarget-08-98812-s001.pdf [file oncotarget-08-98812-s001.pdf]

## Development and validation of a model for staging hepatic fibrosis for chronic hepatitis B patients with E antigen-positive

### SUPPLEMENTARY MATERIALS

**Supplementary Table 1: Diagnostic accuracy of the hepatitis B e antigen positive liver fibrosis (EPLF) score in validation set**

|     | AUROC | 95%CI     | Cutoff value | Sensitivity | Specificity | PPV   | NPV   | LR+   | LR-  | Accuracy |
|-----|-------|-----------|--------------|-------------|-------------|-------|-------|-------|------|----------|
| ≥F1 | 0.73* | 0.65-0.81 | -3.54        | 66%         | 82%         | 61.8% | 78.4% | 1.33  | 0.24 | 0.64     |
| ≥F2 | 0.83* | 0.77-0.89 | -3.17        | 81%         | 75%         | 80.7% | 74.2% | 6.05  | 0.50 | 0.76     |
| ≥F3 | 0.86* | 0.80-0.91 | -2.14        | 72%         | 80%         | 96%   | 67%   | 36.18 | 0.71 | 0.70     |
| F4  | 0.89* | 0.82-0.95 | -1.99        | 89%         | 78%         | 88.9% | 77.9% | 24    | 0.85 | 0.78     |

\*p<0.001. AUROC, area under the receiver operating characteristic; PPV, positive predictive value; NPV, negative predictive value; LR, likelihood Ratio.
